# Supplementary material
Source: PubMed Central journal article supplement (PMC6962893)
Supplement: ijcep0011-3732-f1.pdf [file ijcep0011-3732-f1.pdf]

## NGS in families with fetal non-syndromic AVSDs

**Supplementary Table 1.** AVSD-associated gene list from Phenolyzer

| Gene            | OMIM ID | CHD-associated syndromes or diseases                                                                                | CHD phenotypes                                      |
|-----------------|---------|---------------------------------------------------------------------------------------------------------------------|-----------------------------------------------------|
| <i>ABCD3</i>    | 170995  | Zellweger syndrome                                                                                                  | Heart septal defect                                 |
| <i>ABCD4</i>    | 603214  | Methylmalonic aciduria and homocystinuria cblj type                                                                 | Heart septal defect                                 |
| <i>ACF</i>      | 603375  | Cayler cardiofacial syndrome                                                                                        | Heart septal defect                                 |
| <i>ACTC1</i>    | 102540  | Atrial septal defect 5; dilated cardiomyopathy 1r; hypertrophic cardiomyopathy 11; left ventricular noncompaction 4 | Heart septal defect; heart atrial septal defect     |
| <i>ACVR2B</i>   | 602730  | Situs ambiguus; heterotaxy visceral 4 autosomal                                                                     | Heart septal defect; atrioventricular septal defect |
| <i>ADAMTS10</i> | 608990  | Weill marchesani syndrome                                                                                           | Heart septal defect                                 |
| <i>ADAMTSL2</i> | 612277  | Geleophysic dysplasia                                                                                               | Heart septal defect                                 |
| <i>ADK</i>      | 102750  | Hypermethioninemia due to adenosine kinase deficiency                                                               | Heart septal defect                                 |
| <i>AGGF1</i>    | 608464  | Klippel trenauay weber syndrome                                                                                     | Heart septal defect                                 |
| <i>AHI1</i>     | 608894  | Acrocallosal syndrome; joubert syndrome                                                                             | Heart septal defect                                 |
| <i>ALG1</i>     | 605907  | Congenital disorder of glycosylation                                                                                | Heart septal defect                                 |
| <i>ALG11</i>    | 613666  | Congenital disorder of glycosylation                                                                                | Heart septal defect                                 |
| <i>ALG12</i>    | 607144  | Congenital disorder of glycosylation                                                                                | Heart septal defect                                 |
| <i>ALG13</i>    | 300776  | Congenital disorder of glycosylation                                                                                | Heart septal defect                                 |
| <i>ALG2</i>     | 607905  | Congenital disorder of glycosylation                                                                                | Heart septal defect                                 |
| <i>ALG3</i>     | 608750  | Congenital disorder of glycosylation                                                                                | Heart septal defect                                 |
| <i>ALG6</i>     | 604566  | Congenital disorder of glycosylation                                                                                | Heart septal defect                                 |
| <i>ALG8</i>     | 608103  | Congenital disorder of glycosylation                                                                                | Heart septal defect                                 |
| <i>ALG9</i>     | 606941  | Congenital disorder of glycosylation                                                                                | Heart septal defect                                 |
| <i>ANK1</i>     | 612641  | 8p11.2 deletion syndrome                                                                                            | Heart septal defect                                 |
| <i>ANKRD11</i>  | 611192  | 16q24.3 microdeletion syndrome                                                                                      | Heart septal defect                                 |
| <i>ARHGAP31</i> | 610911  | Adams oliver syndrome                                                                                               | Heart septal defect                                 |
| <i>ARID1A</i>   | 603024  | Coffin siris syndrome                                                                                               | Heart septal defect                                 |
| <i>ARID1B</i>   | 614556  | Coffin siris syndrome                                                                                               | Heart septal defect                                 |
| <i>ARL13B</i>   | 608922  | Acrocallosal syndrome; joubert syndrome                                                                             | Heart septal defect                                 |
| <i>ARVCF</i>    | 602269  | 22q11.2 deletion syndrome                                                                                           | Heart septal defect                                 |
| <i>ARX</i>      | 300382  | Lissencephaly x linked 2                                                                                            | Heart septal defect                                 |
| <i>ASXL1</i>    | 612990  | Bohring opitz syndrome; c like syndrome                                                                             | Heart septal defect                                 |
| <i>ATIC</i>     | 601731  | Aicar transformylase imp cyclohydrolase deficiency                                                                  | Heart septal defect                                 |
| <i>ATP6V0A2</i> | 611716  | Cutis laxa; wrinkly skin syndrome                                                                                   | Heart septal defect                                 |
| <i>ATRX</i>     | 300032  | Atr x syndrome                                                                                                      | Heart septal defect                                 |
| <i>B3GALTL</i>  | 610308  | Peters plus syndrome                                                                                                | Heart septal defect                                 |
| <i>B3GAT3</i>   | 606374  | Multiple joint dislocations short stature craniofacial dysmorphism and congenital heart defects                     | Heart septal defect                                 |
| <i>B4GALT1</i>  | 137060  | Congenital disorder of glycosylation                                                                                | Heart septal defect                                 |
| <i>BAZ1B</i>    | 605681  | Williams syndrome                                                                                                   | Heart septal defect                                 |
| <i>BCL7B</i>    | 605846  | Williams syndrome                                                                                                   | Heart septal defect                                 |
| <i>BCOR</i>     | 300485  | Microphthalmia syndromic 2                                                                                          | Heart septal defect                                 |
| <i>BMP2</i>     | 112261  | 20p12.3 microdeletion syndrome                                                                                      | Heart septal defect                                 |
| <i>BMP4</i>     | 112262  | Microphthalmia syndromic 3                                                                                          | Heart septal defect                                 |
| <i>BPIFA1</i>   | 607412  | Fetal alcohol syndrome                                                                                              | Heart septal defect                                 |
| <i>BRAF</i>     | 164757  | Cardiofaciocutaneous syndrome; leopard syndrome; noonan syndrome                                                    | Heart septal defect; atrioventricular septal defect |
| <i>BRCA2</i>    | 600185  | Fanconi anemia                                                                                                      | Heart septal defect                                 |
| <i>BRIP1</i>    | 605882  | Fanconi anemia                                                                                                      | Heart septal defect                                 |
| <i>BUB1</i>     | 602452  | Mosaic variegated aneuploidy syndrome                                                                               | Heart septal defect                                 |
| <i>BUB1B</i>    | 602860  | Mosaic variegated aneuploidy syndrome                                                                               | Heart septal defect                                 |
| <i>BUB3</i>     | 603719  | Mosaic variegated aneuploidy syndrome                                                                               | Heart septal defect                                 |
| <i>C5ORF42</i>  | 614571  | Acrocallosal syndrome; joubert syndrome                                                                             | Heart septal defect                                 |
| <i>CACNA1D</i>  | 114206  | Primary aldosteronism seizures and neurologic abnormalities                                                         | Heart septal defect                                 |
| <i>CANT1</i>    | 613165  | Desbuquois syndrome                                                                                                 | Heart septal defect                                 |
| <i>CC2D2A</i>   | 612013  | Acrocallosal syndrome; joubert syndrome                                                                             | Heart septal defect                                 |
| <i>CCBE1</i>    | 612753  | Hennekam lymphangiectasia lymphedema syndrome                                                                       | Heart septal defect                                 |
| <i>CD96</i>     | 606037  | Bohring syndrome; opitz trigonocephaly syndrome                                                                     | Heart septal defect                                 |
| <i>CDKN1C</i>   | 600856  | Williams beuren syndrome                                                                                            | Heart septal defect                                 |

## NGS in families with fetal non-syndromic AVSDs

|                   |        |                                                                                                                                       |                                                                                      |
|-------------------|--------|---------------------------------------------------------------------------------------------------------------------------------------|--------------------------------------------------------------------------------------|
| <i>CEP290</i>     | 610142 | Acrocallosal syndrome; joubert syndrome 18; meckel syndrome type 4                                                                    | Heart septal defect                                                                  |
| <i>CEP41</i>      | 610523 | Acrocallosal syndrome; joubert syndrome                                                                                               | Heart septal defect                                                                  |
| <i>CEP57</i>      | 607951 | Mosaic variegated aneuploidy syndrome                                                                                                 | Heart septal defect                                                                  |
| <i>CFC1</i>       | 605194 | Conotruncal heart malformations; double outlet right ventricle; situs ambiguus; heterotaxy visceral 2 autosomal                       | Heart septal defect; atrioventricular septal defect                                  |
| <i>CHD7</i>       | 608892 | Charge syndrome                                                                                                                       | Heart septal defect                                                                  |
| <i>CHST14</i>     | 608429 | Ehlers danlos syndrome musculocontractural type                                                                                       | Heart septal defect                                                                  |
| <i>CHST3</i>      | 603799 | Multiple joint dislocations short stature craniofacial dysmorphism and congenital heart defects                                       | Heart septal defect                                                                  |
| <i>CITED2</i>     | 602937 | Tetralogy of fallot; ventricular septal defect 2; atrial septal defect 8                                                              | Heart septal defect; atrioventricular septal defect                                  |
| <i>CKAP2L</i>     | 616174 | Filippi syndrome                                                                                                                      | Heart septal defect                                                                  |
| <i>CLIP2</i>      | 603432 | Williams syndrome                                                                                                                     | Heart septal defect                                                                  |
| <i>COG1</i>       | 606973 | Congenital disorder of glycosylation                                                                                                  | Heart septal defect                                                                  |
| <i>COG4</i>       | 606976 | Congenital disorder of glycosylation                                                                                                  | Heart septal defect                                                                  |
| <i>COG5</i>       | 606821 | Congenital disorder of glycosylation                                                                                                  | Heart septal defect                                                                  |
| <i>COG6</i>       | 606977 | Congenital disorder of glycosylation                                                                                                  | Heart septal defect                                                                  |
| <i>COG7</i>       | 606978 | Congenital disorder of glycosylation                                                                                                  | Heart septal defect                                                                  |
| <i>COG8</i>       | 606979 | Congenital disorder of glycosylation                                                                                                  | Heart septal defect                                                                  |
| <i>COL11A1</i>    | 120280 | Stickler syndrome, type II                                                                                                            | Heart septal defect                                                                  |
| <i>COL11A2</i>    | 120290 | Otospondylomegaepiphyseal dysplasia                                                                                                   | Heart septal defect                                                                  |
| <i>COL1A1</i>     | 120150 | Ehlers danlos syndrome classic type                                                                                                   | Heart septal defect                                                                  |
| <i>COL2A1</i>     | 120140 | Otospondylomegaepiphyseal dysplasia                                                                                                   | Heart septal defect                                                                  |
| <i>COL5A1</i>     | 120215 | Ehlers danlos syndrome classic type                                                                                                   | Heart septal defect                                                                  |
| <i>COL5A2</i>     | 120190 | Ehlers danlos syndrome classic type                                                                                                   | Heart septal defect                                                                  |
| <i>COMT</i>       | 116790 | 22q11.2 deletion syndrome                                                                                                             | Heart septal defect                                                                  |
| <i>CREBBP</i>     | 600140 | Rubinstein taybi syndrome 1                                                                                                           | Heart septal defect                                                                  |
| <i>CRELD1</i>     | 607170 | Atrioventricular septal defect partial                                                                                                | Heart septal defect; heart ventricular septal defect; atrioventricular septal defect |
| <i>CRKL</i>       | 602007 | Digeorge syndrome                                                                                                                     | Heart septal defect                                                                  |
| <i>CSGALNACT2</i> | 616616 | Hirschsprung disease                                                                                                                  | Heart septal defect; heart ventricular septal defect                                 |
| <i>CTCF</i>       | 604167 | Mental retardation autosomal dominant 21                                                                                              | Heart septal defect                                                                  |
| <i>DDOST</i>      | 602202 | Congenital disorder of glycosylation                                                                                                  | Heart septal defect                                                                  |
| <i>DDX11</i>      | 601150 | Warsaw breakage syndrome                                                                                                              | Heart septal defect                                                                  |
| <i>DHCR7</i>      | 602858 | Smith lemli opitz syndrome                                                                                                            | Heart septal defect; atrioventricular septal defect                                  |
| <i>DHFR</i>       | 126060 | Smith lemli opitz syndrome                                                                                                            | Heart septal defect; atrioventricular canal defect                                   |
| <i>DLG4</i>       | 602887 | Williams syndrome                                                                                                                     | Heart septal defect                                                                  |
| <i>DOCK6</i>      | 614194 | Adams oliver syndrome                                                                                                                 | Heart septal defect                                                                  |
| <i>DOLK</i>       | 610746 | Congenital disorder of glycosylation                                                                                                  | Heart septal defect                                                                  |
| <i>DPAGT1</i>     | 191350 | Congenital disorder of glycosylation                                                                                                  | Heart septal defect                                                                  |
| <i>DPM1</i>       | 603503 | Congenital disorder of glycosylation                                                                                                  | Heart septal defect                                                                  |
| <i>DPM2</i>       | 603564 | Congenital disorder of glycosylation                                                                                                  | Heart septal defect                                                                  |
| <i>DPM3</i>       | 605951 | Congenital disorder of glycosylation                                                                                                  | Heart septal defect                                                                  |
| <i>DSE</i>        | 605942 | Ehlers danlos syndrome musculocontractural type                                                                                       | Heart septal defect                                                                  |
| <i>DTNA</i>       | 601239 | Left ventricular noncompaction                                                                                                        | Heart septal defect                                                                  |
| <i>ECE1</i>       | 600423 | Hirschsprung disease                                                                                                                  | Heart septal defect; heart ventricular septal defect                                 |
| <i>EDN3</i>       | 131242 | Hirschsprung disease                                                                                                                  | Heart septal defect; heart ventricular septal defect                                 |
| <i>EDNRB</i>      | 131244 | Hirschsprung disease                                                                                                                  | Heart septal defect; heart ventricular septal defect                                 |
| <i>EFTUD2</i>     | 603892 | Growth and mental retardation mandibulofacial dysostosis microcephaly and cleft palate; mandibulofacial dysostosis guion almeida type | Heart septal defect                                                                  |
| <i>EHMT1</i>      | 607001 | Kleefstra syndrome; kleefstra syndrome due to 9q34 microdeletion                                                                      | Heart septal defect                                                                  |
| <i>EIF4H</i>      | 603431 | Williams syndrome                                                                                                                     | Heart septal defect                                                                  |
| <i>ELN</i>        | 130160 | Williams syndrome                                                                                                                     | Heart septal defect                                                                  |

## NGS in families with fetal non-syndromic AVSDs

|               |        |                                                                                                                                                                                                 |                                                                                                                  |
|---------------|--------|-------------------------------------------------------------------------------------------------------------------------------------------------------------------------------------------------|------------------------------------------------------------------------------------------------------------------|
| <i>EOGT</i>   | 614789 | Adams oliver syndrome                                                                                                                                                                           | Heart septal defect                                                                                              |
| <i>EPO</i>    | 133170 | Heart septal defects ventricular                                                                                                                                                                | Heart septal defect; heart ventricular septal defects                                                            |
| <i>ERBB3</i>  | 190151 | Lethal congenital contracture syndrome 2                                                                                                                                                        | Heart septal defect                                                                                              |
| <i>ERCC4</i>  | 133520 | Fanconi anemia                                                                                                                                                                                  | Heart septal defect                                                                                              |
| <i>ESCO2</i>  | 609353 | Roberts syndrome                                                                                                                                                                                | Heart septal defect                                                                                              |
| <i>EVC</i>    | 604831 | Ellis van creveld syndrome                                                                                                                                                                      | Heart septal defect; atrioventricular septal defect                                                              |
| <i>EVC2</i>   | 607261 | Ellis van creveld syndrome                                                                                                                                                                      | Heart septal defect; atrioventricular septal defect                                                              |
| <i>EYA1</i>   | 601653 | Cayler cardiofacial syndrome                                                                                                                                                                    | Heart septal defect                                                                                              |
| <i>FAM58A</i> | 300708 | Syndactyly telecanthus anogenital and renal malformations                                                                                                                                       | Heart septal defect                                                                                              |
| <i>FANCA</i>  | 607139 | Fanconi anemia                                                                                                                                                                                  | Heart septal defect                                                                                              |
| <i>FANCB</i>  | 300515 | Vacterl association; fanconi anemia                                                                                                                                                             | Heart septal defect                                                                                              |
| <i>FANCC</i>  | 613899 | Fanconi anemia                                                                                                                                                                                  | Heart septal defect                                                                                              |
| <i>FANCD2</i> | 613984 | Fanconi anemia                                                                                                                                                                                  | Heart septal defect                                                                                              |
| <i>FANCE</i>  | 613976 | Fanconi anemia                                                                                                                                                                                  | Heart septal defect                                                                                              |
| <i>FANCF</i>  | 613897 | Fanconi anemia                                                                                                                                                                                  | Heart septal defect                                                                                              |
| <i>FANCG</i>  | 602956 | Fanconi anemia                                                                                                                                                                                  | Heart septal defect                                                                                              |
| <i>FANCI</i>  | 611360 | Fanconi anemia                                                                                                                                                                                  | Heart septal defect                                                                                              |
| <i>FANCL</i>  | 608111 | Fanconi anemia                                                                                                                                                                                  | Heart septal defect                                                                                              |
| <i>FANCM</i>  | 609644 | Fanconi anemia                                                                                                                                                                                  | Heart septal defect                                                                                              |
| <i>FBN1</i>   | 134797 | Aortic aneurysm familial thoracic 4; marfan syndrome; shprintzen goldberg syndrome; geleophysic dysplasia; weill marchesani syndrome                                                            | Heart septal defect                                                                                              |
| <i>FGF8</i>   | 600483 | Digeorge syndrome                                                                                                                                                                               | Heart septal defect                                                                                              |
| <i>FGFR1</i>  | 136350 | Apert syndrome; encephalocraniocutaneous lipomatosis                                                                                                                                            | Heart septal defect                                                                                              |
| <i>FGFR2</i>  | 176943 | Acrocephalosyndactyly type I; apert syndrome                                                                                                                                                    | Heart septal defect                                                                                              |
| <i>FGFR3</i>  | 134934 | Apert syndrome; thanatophoric dysplasia                                                                                                                                                         | Heart septal defect                                                                                              |
| <i>FIG4</i>   | 609390 | Yunis varon syndrome                                                                                                                                                                            | Heart septal defect                                                                                              |
| <i>FKBP6</i>  | 604839 | Williams syndrome                                                                                                                                                                               | Heart septal defect                                                                                              |
| <i>FKTN</i>   | 607440 | Fukuyama congenital muscular dystrophy                                                                                                                                                          | Heart septal defect                                                                                              |
| <i>FLNA</i>   | 300017 | Cardiac valvular dysplasia x linked; frontometaphyseal dysplasia; melnick needles syndrome; otopalatodigital syndrome type II                                                                   | Heart septal defect; atrioventricular septal defect                                                              |
| <i>FLNB</i>   | 603381 | Larsen syndrome                                                                                                                                                                                 | Heart septal defect                                                                                              |
| <i>FOXC1</i>  | 601090 | Axenfeld rieger syndrome type 3                                                                                                                                                                 | Heart septal defect                                                                                              |
| <i>FOXC2</i>  | 602402 | Lymphedema distichiasis syndrome                                                                                                                                                                | Heart septal defect                                                                                              |
| <i>FOXE3</i>  | 601094 | Anterior segment mesenchymal dysgenesis                                                                                                                                                         | Heart septal defect                                                                                              |
| <i>FOXG1</i>  | 164874 | Acrocallosal syndrome                                                                                                                                                                           | Heart septal defect                                                                                              |
| <i>G6PC3</i>  | 611045 | Dursun syndrome                                                                                                                                                                                 | Heart septal defect; heart atrial septal defect                                                                  |
| <i>GAS1</i>   | 139185 | Holoprosencephaly                                                                                                                                                                               | Heart septal defect                                                                                              |
| <i>GATA1</i>  | 305371 | Diamond blackfan anemia                                                                                                                                                                         | Heart septal defect                                                                                              |
| <i>GATA4</i>  | 600576 | Atrial septal defect 2; atrioventricular septal defect 4; tetralogy of fallot; ventricular septal defect 1; 8p23.1 microdeletion syndrome                                                       | Heart septal defect; heart atrial septal defect; heart ventricular septal defect; atrioventricular septal defect |
| <i>GATA6</i>  | 601656 | Conotruncal heart malformations; persistent truncus arteriosus; tetralogy of fallot; atrioventricular septal defect 5; pancreatic agenesis and congenital heart defects; atrial septal defect 9 | Heart septal defect; atrioventricular septal defect                                                              |
| <i>GDF1</i>   | 602880 | Conotruncal heart malformations; double outlet right ventricle; right atrial isomerism; tetralogy of fallot                                                                                     | Heart septal defect; atrioventricular septal defect                                                              |
| <i>GDF3</i>   | 606522 | Isolated klippel feil syndrome                                                                                                                                                                  | Heart septal defect                                                                                              |
| <i>GDF6</i>   | 601147 | Isolated klippel feil syndrome                                                                                                                                                                  | Heart septal defect                                                                                              |
| <i>GDNF</i>   | 600837 | Hirschsprung disease                                                                                                                                                                            | Heart septal defect; heart ventricular septal defects                                                            |
| <i>GH1</i>    | 139250 | Turner syndrome                                                                                                                                                                                 | Heart septal defect                                                                                              |
| <i>GJA1</i>   | 121014 | Atrioventricular septal defect 3; hypoplastic left heart syndrome; palmoplantar keratoderma; oculodentodigital dysplasia                                                                        | Heart septal defect; atrioventricular septal defect                                                              |
| <i>GLA</i>    | 300644 | Fabry disease                                                                                                                                                                                   | Heart septal defect                                                                                              |
| <i>GLI3</i>   | 165240 | Acrocallosal syndrome; pallister hall syndrome                                                                                                                                                  | Heart septal defect                                                                                              |
| <i>GP1BB</i>  | 138720 | 22q11.2 deletion syndrome                                                                                                                                                                       | Heart septal defect                                                                                              |
| <i>GPC3</i>   | 300037 | Simpson golabi behmel syndrome                                                                                                                                                                  | Heart septal defect                                                                                              |

## NGS in families with fetal non-syndromic AVSDs

|                 |        |                                                                                                                                              |                                                     |
|-----------------|--------|----------------------------------------------------------------------------------------------------------------------------------------------|-----------------------------------------------------|
| <i>GPC4</i>     | 300168 | Simpson golabi behmel syndrome                                                                                                               | Heart septal defect                                 |
| <i>GPC6</i>     | 604404 | Omodysplasia 1                                                                                                                               | Heart septal defect                                 |
| <i>GPX4</i>     | 138322 | Spondylometaphyseal dysplasia sedaghatian type                                                                                               | Heart septal defect                                 |
| <i>GTF2I</i>    | 601679 | Williams syndrome                                                                                                                            | Heart septal defect                                 |
| <i>GTF2IRD1</i> | 604318 | Williams syndrome                                                                                                                            | Heart septal defect                                 |
| <i>HCCS</i>     | 300056 | Microphthalmia syndromic 7                                                                                                                   | Heart septal defect                                 |
| <i>HDAC8</i>    | 300269 | Cornelia de lange syndrome; de lange syndrome                                                                                                | Heart septal defect                                 |
| <i>HIRA</i>     | 600237 | 22q11.2 deletion syndrome                                                                                                                    | Heart septal defect                                 |
| <i>HOXA13</i>   | 142959 | Hand foot genital syndrome                                                                                                                   | Heart septal defect                                 |
| <i>HRAS</i>     | 190020 | Costello syndrome                                                                                                                            | Heart septal defect                                 |
| <i>HSD17B4</i>  | 601860 | Zellweger syndrome                                                                                                                           | Heart septal defect                                 |
| <i>HSPG2</i>    | 142461 | Dyssegmental dysplasia silverman handmaker type                                                                                              | Heart septal defect                                 |
| <i>HYLS1</i>    | 610693 | Hydrolethalus syndrome                                                                                                                       | Heart septal defect; atrioventricular septal defect |
| <i>IMPAD1</i>   | 614010 | Catel manzke syndrome                                                                                                                        | Heart septal defect                                 |
| <i>INPP5E</i>   | 613037 | Acrocallosal syndrome; joubert syndrome                                                                                                      | Heart septal defect                                 |
| <i>IRX5</i>     | 606195 | Hamamy syndrome                                                                                                                              | Heart septal defect                                 |
| <i>JAG1</i>     | 601920 | Alagille syndrome; deafness congenital heart defects and posterior embryotoxon; tetralogy of fallot                                          | Heart septal defect                                 |
| <i>KANSL1</i>   | 612452 | Koolen de vries syndrome                                                                                                                     | Heart septal defect                                 |
| <i>KAT6B</i>    | 605880 | Noonan syndrome; young simpson syndrome; blepharophimosis intellectual deficit syndrome sbbys type; genitopatellar syndrome; noonan syndrome | Heart septal defect; atrioventricular septal defect |
| <i>KDM6A</i>    | 300128 | Kabuki make up syndrome                                                                                                                      | Heart septal defect                                 |
| <i>KIAA0196</i> | 610657 | 3c syndrome; dandy walker like malformation                                                                                                  | Heart septal defect; heart atrial septal defect     |
| <i>KIF7</i>     | 611254 | Acrocallosal syndrome; joubert syndrome 18                                                                                                   | Heart septal defect                                 |
| <i>KMT2D</i>    | 602113 | Kabuki make up syndrome                                                                                                                      | Heart septal defect                                 |
| <i>KRAS</i>     | 190070 | Cardiofaciocutaneous syndrome; noonan syndrome; costello syndrome                                                                            | Heart septal defect                                 |
| <i>L1CAM</i>    | 308840 | Hirschsprung disease                                                                                                                         | Heart ventricular septal defect                     |
| <i>LAT2</i>     | 605719 | Williams syndrome                                                                                                                            | Heart septal defect                                 |
| <i>LBR</i>      | 600024 | Pelger huet anomaly                                                                                                                          | Heart septal defect                                 |
| <i>LETM1</i>    | 604407 | Wolf hirschhorn syndrome                                                                                                                     | Heart septal defect                                 |
| <i>LIMK1</i>    | 601329 | Williams syndrome                                                                                                                            | Heart septal defect                                 |
| <i>LMNA</i>     | 150330 | Heart hand syndrome slovenian type; left ventricular noncompaction; restrictive dermopathy lethal                                            | Heart septal defect                                 |
| <i>LONP1</i>    | 605490 | Codas syndrome                                                                                                                               | Heart septal defect                                 |
| <i>LRP2</i>     | 600073 | Donnai barrow syndrome                                                                                                                       | Heart septal defect                                 |
| <i>LRP5</i>     | 603506 | Osteoporosis pseudoglioma syndrome                                                                                                           | Heart septal defect                                 |
| <i>LTBP2</i>    | 602091 | Weill marchesani syndrome                                                                                                                    | Heart septal defect                                 |
| <i>LTBP4</i>    | 604710 | Cutis laxa                                                                                                                                   | Heart septal defect                                 |
| <i>MAGT1</i>    | 300715 | Congenital disorder of glycosylation                                                                                                         | Heart septal defect                                 |
| <i>MAP2K1</i>   | 176872 | Cardiofaciocutaneous syndrome; noonan syndrome                                                                                               | Heart septal defect                                 |
| <i>MAP2K2</i>   | 601263 | Cardiofaciocutaneous syndrome                                                                                                                | Heart septal defect                                 |
| <i>MED12</i>    | 300188 | Lujan fryns syndrome; x linked intellectual deficit; x linked mental retardation                                                             | Heart septal defect                                 |
| <i>MEGF8</i>    | 604267 | Carpenter syndrome                                                                                                                           | Heart septal defect                                 |
| <i>MEOX1</i>    | 600147 | Isolated klippel feil syndrome                                                                                                               | Heart septal defect                                 |
| <i>MGAT2</i>    | 602616 | Congenital disorder of glycosylation type iia                                                                                                | Heart septal defect                                 |
| <i>MGP</i>      | 154870 | Keutel syndrome                                                                                                                              | Heart septal defect                                 |
| <i>MID1</i>     | 300552 | Opitz frias syndrome                                                                                                                         | Heart septal defect; atrioventricular septal defect |
| <i>MKKS</i>     | 604896 | Mckusick kaufman syndrome                                                                                                                    | Heart septal defect                                 |
| <i>MKS1</i>     | 609883 | Meckel syndrome type 1                                                                                                                       | Heart septal defect; atrioventricular septal defect |
| <i>MLXIPL</i>   | 605678 | Williams syndrome                                                                                                                            | Heart septal defect                                 |
| <i>MMP14</i>    | 600754 | Torg winchester syndrome                                                                                                                     | Heart septal defect                                 |
| <i>MMP2</i>     | 120360 | Torg winchester syndrome                                                                                                                     | Heart septal defect                                 |
| <i>MOGS</i>     | 601336 | Congenital disorder of glycosylation                                                                                                         | Heart septal defect                                 |
| <i>MPDU1</i>    | 604041 | Congenital disorder of glycosylation                                                                                                         | Heart septal defect                                 |
| <i>MPI</i>      | 154550 | Congenital disorder of glycosylation                                                                                                         | Heart septal defect                                 |
| <i>MSX1</i>     | 142983 | Wolf hirschhorn syndrome                                                                                                                     | Heart septal defect                                 |

## NGS in families with fetal non-syndromic AVSDs

|               |        |                                                                                                                         |                                                        |
|---------------|--------|-------------------------------------------------------------------------------------------------------------------------|--------------------------------------------------------|
| <i>MX1</i>    | 147150 | Fanconi anemia                                                                                                          | Heart septal defect                                    |
| <i>MYH6</i>   | 160710 | Atrial septal defect 3; dilated cardiomyopathy 1ee; hypertrophic cardiomyopathy 14                                      | Heart septal defect; heart atrial septal defect        |
| <i>MYL2</i>   | 160781 | Cardiomyopathy familial hypertrophic 10                                                                                 | Heart septal defect                                    |
| <i>NAA10</i>  | 300013 | N-terminal acetyltransferase deficiency; ogden syndrome                                                                 | Heart septal defect                                    |
| <i>NEK8</i>   | 609799 | Renal hepatic pancreatic dysplasia                                                                                      | Heart septal defect                                    |
| <i>NEK9</i>   | 609798 | Arthrogryposis perthes disease and upward gaze palsy                                                                    | Heart septal defect                                    |
| <i>NELFA</i>  | 606026 | Wolf hirschhorn syndrome                                                                                                | Heart septal defect                                    |
| <i>NFIX</i>   | 164005 | Marshall smith syndrome; sotos syndrome                                                                                 | Heart septal defect                                    |
| <i>NIPBL</i>  | 608667 | Cornelia de lange syndrome                                                                                              | Heart septal defect                                    |
| <i>NKX2-5</i> | 600584 | Atrial septal defect 7; conotruncal heart malformations; tetralogy of fallot; ventricular septal defect 3               | Heart atrial septal defect; heart septal defect        |
| <i>NKX2-6</i> | 611770 | Conotruncal heart malformations; persistent truncus arteriosus                                                          | Heart septal defect                                    |
| <i>NODAL</i>  | 601265 | Heterotaxy visceral 5 autosomal                                                                                         | Heart septal defect                                    |
| <i>NOS3</i>   | 163729 | Fabry disease                                                                                                           | Heart septal defect                                    |
| <i>NOTCH2</i> | 600275 | Alagille syndrome; hajdu cheney syndrome                                                                                | Heart septal defect                                    |
| <i>NOTCH3</i> | 600276 | Lateral meningocele syndrome                                                                                            | Heart septal defect                                    |
| <i>NPHP1</i>  | 607100 | Acrocallosal syndrome; joubert syndrome                                                                                 | Heart septal defect                                    |
| <i>NPHP3</i>  | 608002 | Renal hepatic pancreatic dysplasia                                                                                      | Heart septal defect                                    |
| <i>NRAS</i>   | 164790 | Noonan syndrome                                                                                                         | Heart septal defect                                    |
| <i>NRG1</i>   | 142445 | Hirschsprung disease                                                                                                    | Heart septal defect; heart ventricular septal defect   |
| <i>NRTN</i>   | 602018 | Hirschsprung disease                                                                                                    | Heart septal defect; heart ventricular septal defect   |
| <i>NSD1</i>   | 606681 | Sotos syndrome                                                                                                          | Heart septal defect                                    |
| <i>NSDHL</i>  | 300275 | Child syndrome                                                                                                          | Heart septal defect                                    |
| <i>OFD1</i>   | 300170 | Primary ciliary dyskinesia; acrocallosal syndrome; joubert syndrome 18                                                  | Heart septal defect                                    |
| <i>OTX2</i>   | 600037 | Microphthalmia syndromic 3                                                                                              | Heart septal defect                                    |
| <i>PALB2</i>  | 610355 | Fanconi anemia                                                                                                          | Heart septal defect                                    |
| <i>PAX2</i>   | 167409 | Microphthalmia syndromic 3                                                                                              | Heart septal defect                                    |
| <i>PAX3</i>   | 606597 | Waardenburg syndrome type 3                                                                                             | Heart septal defect                                    |
| <i>PCNT</i>   | 605925 | Microcephalic osteodysplastic primordial dwarfism type II                                                               | Heart septal defect                                    |
| <i>PCSK5</i>  | 600488 | Heart septal defects; heart ventricular septal defects                                                                  | Heart septal defects; heart ventricular septal defects |
| <i>PEX1</i>   | 602136 | Zellweger syndrome                                                                                                      | Heart septal defect                                    |
| <i>PEX10</i>  | 602859 | Zellweger syndrome                                                                                                      | Heart septal defect                                    |
| <i>PEX11B</i> | 603867 | Zellweger syndrome                                                                                                      | Heart septal defect                                    |
| <i>PEX12</i>  | 601758 | Zellweger syndrome                                                                                                      | Heart septal defect                                    |
| <i>PEX13</i>  | 601789 | Zellweger syndrome                                                                                                      | Heart septal defect                                    |
| <i>PEX14</i>  | 601791 | Zellweger syndrome                                                                                                      | Heart septal defect                                    |
| <i>PEX16</i>  | 603360 | Zellweger syndrome                                                                                                      | Heart septal defect                                    |
| <i>PEX19</i>  | 600279 | Zellweger syndrome                                                                                                      | Heart septal defect                                    |
| <i>PEX2</i>   | 170993 | Zellweger syndrome                                                                                                      | Heart septal defect                                    |
| <i>PEX26</i>  | 608666 | Zellweger syndrome                                                                                                      | Heart septal defect                                    |
| <i>PEX3</i>   | 603164 | Zellweger syndrome                                                                                                      | Heart septal defect                                    |
| <i>PEX5</i>   | 600414 | Zellweger syndrome                                                                                                      | Heart septal defect                                    |
| <i>PEX6</i>   | 601498 | Zellweger syndrome                                                                                                      | Heart septal defect                                    |
| <i>PGM1</i>   | 171900 | Congenital disorder of glycosylation                                                                                    | Heart septal defect                                    |
| <i>PHOX2B</i> | 603851 | Hirschsprung disease                                                                                                    | Heart septal defects; heart ventricular septal defects |
| <i>PIEZO2</i> | 613629 | Marden walker syndrome                                                                                                  | Heart septal defect                                    |
| <i>PIGA</i>   | 311770 | Multiple congenital anomalies hypotonia seizures syndrome 2                                                             | Heart septal defect                                    |
| <i>PIGL</i>   | 605947 | Chime syndrome; zunich neuroectodermal syndrome                                                                         | Heart septal defect                                    |
| <i>PIGN</i>   | 606097 | Multiple congenital anomalies hypotonia seizures syndrome 1                                                             | Heart septal defect                                    |
| <i>PIK3CA</i> | 171834 | Megalencephaly capillary malformation polymicrogyria syndrome; megalencephaly cutis marmorata telangiectatica congenita | Heart septal defect                                    |
| <i>PIK3R2</i> | 603157 | Megalencephaly polymicrogyria polydactyly hydrocephalus syndrome                                                        | Heart septal defect                                    |

## NGS in families with fetal non-syndromic AVSDs

|                 |        |                                                                     |                                                      |
|-----------------|--------|---------------------------------------------------------------------|------------------------------------------------------|
| <i>PITX2</i>    | 601542 | Microphthalmia syndromic 3                                          | Heart septal defect                                  |
| <i>PITX3</i>    | 602669 | Anterior segment mesenchymal dysgenesis; microphthalmia syndromic 3 | Heart septal defect                                  |
| <i>PMM2</i>     | 601785 | Congenital disorder of glycosylation                                | Heart septal defect                                  |
| <i>PORCN</i>    | 300651 | Focal dermal hypoplasia                                             | Heart septal defect                                  |
| <i>PQBP1</i>    | 300463 | Hamel cerebro palato cardiac syndrome; renpenning syndrome 1        | Heart septal defect                                  |
| <i>PTEN</i>     | 601728 | Leopard syndrome                                                    | Heart septal defects; atrioventricular canal defect  |
| <i>PTPN11</i>   | 176876 | Leopard syndrome; noonan syndrome; tetralogy of fallot              | Heart septal defect; atrioventricular septal defect  |
| <i>PUF60</i>    | 604819 | Verheij syndrome                                                    | Heart septal defect                                  |
| <i>PYCR1</i>    | 179035 | Cutis laxa                                                          | Heart septal defect                                  |
| <i>RAB23</i>    | 606144 | Carpenter syndrome                                                  | Heart septal defect                                  |
| <i>RAD21</i>    | 606462 | Cornelia de lange syndrome                                          | Heart septal defect                                  |
| <i>RAD51C</i>   | 602774 | Fanconi anemia                                                      | Heart septal defect                                  |
| <i>RAF1</i>     | 164760 | Leopard syndrome; noonan syndrome; dilated cardiomyopathy 1nn       | Heart septal defect; atrioventricular septal defect  |
| <i>RAI1</i>     | 607642 | Potocki lupski syndrome                                             | Heart septal defect                                  |
| <i>RARB</i>     | 180220 | Microphthalmia syndromic 12                                         | Heart septal defect                                  |
| <i>RASGEF1A</i> | 614531 | Hirschsprung disease                                                | Heart septal defect; heart ventricular septal defect |
| <i>RAX</i>      | 601881 | Microphthalmia syndromic 3                                          | Heart septal defect                                  |
| <i>RBM10</i>    | 300080 | Tarp syndrome                                                       | Heart septal defect                                  |
| <i>RBM8A</i>    | 605313 | Thrombocytopenia absent radius syndrome                             | Heart septal defect                                  |
| <i>RBPJ</i>     | 147183 | Adams oliver syndrome                                               | Heart septal defect                                  |
| <i>RECQL4</i>   | 603780 | Rapadilino syndrome; baller gerold syndrome                         | Heart septal defect; heart atrial septal defect      |
| <i>RET</i>      | 164761 | Hirschsprung disease                                                | Heart septal defect; heart ventricular septal defect |
| <i>RFC2</i>     | 600404 | Williams syndrome                                                   | Heart septal defect                                  |
| <i>RFT1</i>     | 611908 | Congenital disorder of glycosylation                                | Heart septal defect                                  |
| <i>RIT1</i>     | 609591 | Noonan syndrome                                                     | Heart septal defect                                  |
| <i>RMRP</i>     | 157660 | Cartilage hair hypoplasia                                           | Heart septal defect                                  |
| <i>RNU4ATAC</i> | 601428 | Microcephalic osteodysplastic primordial dwarfism type I            | Heart septal defect                                  |
| <i>ROR2</i>     | 602337 | Brachydactyly type b; robinow syndrome autosomal recessive          | Heart septal defect                                  |
| <i>RPGRIP1L</i> | 610937 | Acrocallosal syndrome; joubert syndrome                             | Heart septal defect                                  |
| <i>RPL11</i>    | 604175 | Diamond blackfan anemia                                             | Heart septal defect                                  |
| <i>RPL15</i>    | 604174 | Diamond blackfan anemia                                             | Heart septal defect                                  |
| <i>RPL26</i>    | 603704 | Diamond blackfan anemia                                             | Heart septal defect                                  |
| <i>RPL35A</i>   | 180468 | Diamond blackfan anemia                                             | Heart septal defect                                  |
| <i>RPL5</i>     | 603634 | Aase syndrome; diamond blackfan anemia                              | Heart septal defect                                  |
| <i>RPS10</i>    | 603632 | Diamond blackfan anemia                                             | Heart septal defect                                  |
| <i>RPS17</i>    | 180472 | Diamond blackfan anemia                                             | Heart septal defect                                  |
| <i>RPS19</i>    | 603474 | Diamond blackfan anemia                                             | Heart septal defect                                  |
| <i>RPS24</i>    | 602412 | Diamond blackfan anemia                                             | Heart septal defect                                  |
| <i>RPS26</i>    | 603701 | Diamond blackfan anemia                                             | Heart septal defect                                  |
| <i>RPS28</i>    | 603685 | Diamond blackfan anemia                                             | Heart septal defect                                  |
| <i>RPS7</i>     | 603658 | Diamond blackfan anemia                                             | Heart septal defect                                  |
| <i>SALL1</i>    | 602218 | Townes brocks syndrome                                              | Heart septal defect                                  |
| <i>SALL4</i>    | 607343 | Duane radial ray syndrome                                           | Heart septal defect                                  |
| <i>SEMA3C</i>   | 602645 | Truncus arteriosus persistent                                       | Heart septal defect                                  |
| <i>SEMA3E</i>   | 608166 | Charge syndrome                                                     | Heart septal defect                                  |
| <i>SETBP1</i>   | 611060 | Schinzel giedion midface retraction syndrome                        | Heart septal defect                                  |
| <i>SH2B1</i>    | 608937 | Proximal 16p11.2 microdeletion syndrome                             | Heart septal defect                                  |
| <i>SHANK3</i>   | 606230 | Phelan mcdermid syndrome                                            | Heart septal defect                                  |
| <i>SHH</i>      | 600725 | Single upper central incisor                                        | Heart septal defect; atrioventricular septal defect  |
| <i>SHOC2</i>    | 602775 | Noonan syndrome                                                     | Heart septal defect                                  |
| <i>SIX3</i>     | 603714 | Microphthalmia syndromic 3                                          | Heart septal defect                                  |
| <i>SIX6</i>     | 606326 | Microphthalmia syndromic 3                                          | Heart septal defect                                  |
| <i>SLC19A2</i>  | 603941 | Thiamine responsive megaloblastic anemia syndrome                   | Heart septal defect                                  |

## NGS in families with fetal non-syndromic AVSDs

|                |        |                                                                                                                                                                                       |                                                                                 |
|----------------|--------|---------------------------------------------------------------------------------------------------------------------------------------------------------------------------------------|---------------------------------------------------------------------------------|
| <i>SLC29A3</i> | 612373 | Dysosteosclerosis; faisalabad histiocytosis; h syndrome; histiocytosis lymphadenopathy plus syndrome                                                                                  | Heart septal defect                                                             |
| <i>SLC35A1</i> | 605634 | Congenital disorder of glycosylation                                                                                                                                                  | Heart septal defect                                                             |
| <i>SLC35C1</i> | 605881 | Congenital disorder of glycosylation                                                                                                                                                  | Heart septal defect                                                             |
| <i>SLX4</i>    | 613278 | Fanconi anemia                                                                                                                                                                        | Heart septal defect                                                             |
| <i>SMAD4</i>   | 600993 | Myhre syndrome                                                                                                                                                                        | Heart septal defect                                                             |
| <i>SMARCA2</i> | 600014 | Coffin siris syndrome                                                                                                                                                                 | Heart septal defect                                                             |
| <i>SMARCA4</i> | 603254 | Coffin siris syndrome                                                                                                                                                                 | Heart septal defect                                                             |
| <i>SMARCB1</i> | 601607 | Coffin siris syndrome                                                                                                                                                                 | Heart septal defect                                                             |
| <i>SMARCE1</i> | 603111 | Coffin siris syndrome                                                                                                                                                                 | Heart septal defect                                                             |
| <i>SMC1A</i>   | 300040 | Cornelia de lange syndrome                                                                                                                                                            | Heart septal defect                                                             |
| <i>SMC3</i>    | 606062 | Cornelia de lange syndrome                                                                                                                                                            | Heart septal defect                                                             |
| <i>SNRPB</i>   | 182282 | Cerebrocostomandibular syndrome                                                                                                                                                       | Heart septal defect                                                             |
| <i>SNX3</i>    | 605930 | Microphthalmia syndromic 8                                                                                                                                                            | Heart septal defect                                                             |
| <i>SOS1</i>    | 182530 | Noonan syndrome                                                                                                                                                                       | Heart septal defect                                                             |
| <i>SOX2</i>    | 184429 | Microphthalmia syndromic 3                                                                                                                                                            | Heart septal defect                                                             |
| <i>SPECC1L</i> | 614140 | Opitz gbbb syndrome type ii                                                                                                                                                           | Heart septal defect                                                             |
| <i>SRCAP</i>   | 611421 | Floating harbor syndrome                                                                                                                                                              | Heart septal defect; heart ventricular septal defect                            |
| <i>SRD5A3</i>  | 611715 | Congenital disorder of glycosylation                                                                                                                                                  | Heart septal defect                                                             |
| <i>STAMBIP</i> | 606247 | Microcephaly capillary malformation syndrome                                                                                                                                          | Heart septal defect                                                             |
| <i>STRA6</i>   | 610745 | Microphthalmia syndromic 9                                                                                                                                                            | Heart septal defect                                                             |
| <i>STRADA</i>  | 608626 | Polyhydramnios megalencephaly and symptomatic epilepsy                                                                                                                                | Heart septal defect                                                             |
| <i>SYNE1</i>   | 608441 | Emery dreifuss muscular dystrophy 4 autosomal dominant                                                                                                                                | Heart septal defect                                                             |
| <i>TBL2</i>    | 605842 | Williams syndrome                                                                                                                                                                     | Heart septal defect                                                             |
| <i>TBX1</i>    | 602054 | 22q11.2 deletion syndrome; conotruncal anomaly face syndrome; conotruncal heart malformations; digeorge syndrome; shprintzen syndrome; tetralogy of fallot; velocardiofacial syndrome | Heart septal defect                                                             |
| <i>TBX20</i>   | 606061 | Atrial septal defect 4                                                                                                                                                                | Heart septal defect; heart atrial septal defect                                 |
| <i>TBX3</i>    | 601621 | Ulnar mammary syndrome                                                                                                                                                                | Heart septal defect                                                             |
| <i>TBX5</i>    | 601620 | Holt oram syndrome                                                                                                                                                                    | Heart septal defect; heart atrial septal defect; atrioventricular septal defect |
| <i>TCF4</i>    | 602272 | Pallister hall syndrome                                                                                                                                                               | Heart septal defect                                                             |
| <i>TCTN1</i>   | 609863 | Acrocallosal syndrome; joubert syndrome                                                                                                                                               | Heart septal defect                                                             |
| <i>TCTN2</i>   | 613846 | Acrocallosal syndrome; joubert syndrome                                                                                                                                               | Heart septal defect                                                             |
| <i>TCTN3</i>   | 613847 | Acrocallosal syndrome; joubert syndrome 18                                                                                                                                            | Heart septal defect                                                             |
| <i>TDGF1</i>   | 187395 | Holoprosencephaly                                                                                                                                                                     | Heart septal defect                                                             |
| <i>TFAP2B</i>  | 601601 | Char syndrome; patent ductus arteriosus 2                                                                                                                                             | Heart septal defect                                                             |
| <i>TGDS</i>    | 616146 | Catel manzke syndrome                                                                                                                                                                 | Heart septal defect                                                             |
| <i>TGFBR1</i>  | 190181 | loeys dietz syndrome type 1a                                                                                                                                                          | Heart septal defect                                                             |
| <i>TGFBR2</i>  | 190182 | loeys dietz syndrome type 1b                                                                                                                                                          | Heart septal defect                                                             |
| <i>TGIF1</i>   | 602630 | Holoprosencephaly                                                                                                                                                                     | Heart septal defect                                                             |
| <i>TLL1</i>    | 606742 | Atrial septal defect 6                                                                                                                                                                | Heart septal defect; heart atrial septal defect                                 |
| <i>TMEM138</i> | 614459 | Acrocallosal syndrome; joubert syndrome                                                                                                                                               | Heart septal defect                                                             |
| <i>TMEM165</i> | 614726 | Congenital disorder of glycosylation                                                                                                                                                  | Heart septal defect                                                             |
| <i>TMEM216</i> | 613277 | Acrocallosal syndrome; joubert syndrome                                                                                                                                               | Heart septal defect                                                             |
| <i>TMEM231</i> | 614949 | Acrocallosal syndrome; joubert syndrome                                                                                                                                               | Heart septal defect                                                             |
| <i>TMEM237</i> | 614423 | Acrocallosal syndrome; joubert syndrome                                                                                                                                               | Heart septal defect                                                             |
| <i>TMEM67</i>  | 609884 | Acrocallosal syndrome; joubert syndrome                                                                                                                                               | Heart septal defect                                                             |
| <i>TNF</i>     | 191160 | Fanconi anemia                                                                                                                                                                        | Heart septal defect                                                             |
| <i>TP63</i>    | 603273 | Ankyloblepharon ectodermal defects cleft lip palate; hay wells syndrome                                                                                                               | Heart septal defect                                                             |
| <i>TSMF</i>    | 604723 | Combined oxidative phosphorylation deficiency 3                                                                                                                                       | Heart septal defect                                                             |
| <i>TTC21B</i>  | 612014 | Acrocallosal syndrome; joubert syndrome                                                                                                                                               | Heart septal defect                                                             |
| <i>TTC37</i>   | 614589 | Trichohepatoenteric syndrome 1                                                                                                                                                        | Heart septal defect                                                             |
| <i>TUSC3</i>   | 601385 | Congenital disorder of glycosylation                                                                                                                                                  | Heart septal defect                                                             |
| <i>TWSG1</i>   | 605049 | Holoprosencephaly                                                                                                                                                                     | Heart septal defect                                                             |
| <i>TXNL4A</i>  | 611595 | Burn mckeown syndrome                                                                                                                                                                 | Heart septal defect                                                             |



## NGS in families with fetal non-syndromic AVSDs

|                 |        |                                                                                                                                |                                                       |
|-----------------|--------|--------------------------------------------------------------------------------------------------------------------------------|-------------------------------------------------------|
| <i>UBR1</i>     | 605981 | Johanson blizzard syndrome                                                                                                     | Heart septal defect                                   |
| <i>UFD1L</i>    | 601754 | 22q11.2 deletion syndrome                                                                                                      | Heart septal defect                                   |
| <i>UMPS</i>     | 613891 | Orotic aciduria                                                                                                                | Heart septal defect                                   |
| <i>VAX1</i>     | 604294 | Microphthalmia syndromic 3                                                                                                     | Heart septal defect                                   |
| <i>VEGFA</i>    | 192240 | Heart septal defects ventricular                                                                                               | Heart septal defect; heart ventricular septal defects |
| <i>VIPAS39</i>  | 613401 | Arthrogryposis renal dysfunction and cholestasis 2                                                                             | Heart septal defect                                   |
| <i>VPS13B</i>   | 607817 | Cohen syndrome                                                                                                                 | Heart septal defect                                   |
| <i>VPS33B</i>   | 608552 | Arthrogryposis renal dysfunction and cholestasis 1                                                                             | Heart septal defect                                   |
| <i>VSX2</i>     | 142993 | Microphthalmia syndromic 3                                                                                                     | Heart septal defect                                   |
| <i>WBSCR22</i>  | 615733 | Williams syndrome                                                                                                              | Heart septal defect                                   |
| <i>WBSCR27</i>  | 612546 | Williams syndrome                                                                                                              | Heart septal defect                                   |
| <i>WDPCP</i>    | 613580 | Congenital heart defects hamartomas of tongue and polysyndactyly; orstavik lindemann solberg syndrome                          | Heart septal defect; atrioventricular septal defect   |
| <i>WHSC1</i>    | 602952 | Wolf hirschhorn syndrome                                                                                                       | Heart septal defect                                   |
| <i>WT1</i>      | 607102 | Meacham syndrome                                                                                                               | Heart septal defect                                   |
| <i>YY1AP1</i>   | 607860 | Grange syndrome                                                                                                                | Heart septal defect                                   |
| <i>ZEB2</i>     | 605802 | Mowat wilson syndrome                                                                                                          | Heart septal defect                                   |
| <i>ZIC3</i>     | 300265 | Double outlet right ventricle; heterotaxy visceral x linked; situs ambiguus; vacterl association; vacterl association x linked | Heart septal defect                                   |
| <i>ZMPSTE24</i> | 606480 | Restrictive dermopathy lethal                                                                                                  | Heart septal defect                                   |

Abbreviations: AVSD, atrioventricular septal defect; CHD, congenital heart disease.

**Supplementary Table 2. AVSD-associated gene list from related published literatures**

| Gene                | OMIM ID | CHD-associated syndromes or diseases                                                      | CHD Phenotypes                                      | Genetic variation in human AVSD | Play a role in AVSD formation in animal models |
|---------------------|---------|-------------------------------------------------------------------------------------------|-----------------------------------------------------|---------------------------------|------------------------------------------------|
| <i>COL1A2</i>       | 120160  | Ehlers danlos syndrome autosomal recessive cardiac valvular form; osteogenesis imperfecta | Heart septal defect; atrioventricular septal defect | No                              | Yes                                            |
| <i>COL6A1</i>       | 120220  | -                                                                                         | Heart septal defect; atrioventricular septal defect | Yes                             | Yes                                            |
| <i>COL6A2</i>       | 120240  | -                                                                                         | Heart septal defect; atrioventricular septal defect | Yes                             | Yes                                            |
| <i>NR2F2</i>        | 107773  | Congenital heart defects multiple types, 4                                                | Heart septal defect; atrioventricular septal defect | Yes                             | Yes                                            |
| <i>DSCAM</i>        | 602523  | Down's syndrome                                                                           | Heart septal defect; atrioventricular septal defect | Yes                             | No                                             |
| <i>DNAHC11</i>      | 603339  | Ciliary dyskinesia, primary, 7, with or without situs inversus                            | Heart septal defect; atrioventricular septal defect | No                              | Yes                                            |
| <i>FOXP1</i>        | 605515  | Mental retardation with language impairment and with or without autistic features         | Heart septal defect; atrioventricular septal defect | Yes                             | Yes                                            |
| <i>ACVR1 (ALK2)</i> | 102576  | Cardiac death sudden                                                                      | Heart septal defect; atrioventricular septal defect | Yes                             | Yes                                            |
| <i>BMP5</i>         | 112265  | -                                                                                         | Heart septal defect; atrioventricular septal defect | No                              | Yes                                            |
| <i>COL18A1</i>      | 120328  | Heart valve diseases                                                                      | Heart septal defect; atrioventricular septal defect | No                              | Yes                                            |
| <i>CYR61 (CCN1)</i> | 602369  | -                                                                                         | Heart septal defect; atrioventricular septal defect | No                              | Yes                                            |
| <i>FBLN2</i>        | 135821  | -                                                                                         | Heart septal defect; atrioventricular septal defect | Yes                             | Yes                                            |
| <i>FGF2</i>         | 134920  | Cardiomegaly; myocardial ischemia                                                         | Heart septal defect; atrioventricular septal defect | No                              | Yes                                            |
| <i>FRZB</i>         | 605083  | -                                                                                         | Heart septal defect; atrioventricular septal defect | Yes                             | Yes                                            |
| <i>GATA5</i>        | 611496  | Familial atrial fibrillation                                                              | Heart septal defect; atrioventricular septal defect | Yes                             | Yes                                            |
| <i>HEY2</i>         | 604674  | Brugada syndrome; cardiomyopathy hypertrophic                                             | Heart septal defect; atrioventricular septal defect | Yes                             | Yes                                            |
| <i>ROCK1</i>        | 601702  | -                                                                                         | Heart septal defect; atrioventricular septal defect | No                              | Yes                                            |
| <i>WNT9A</i>        | 602863  | -                                                                                         | Heart septal defect; atrioventricular septal defect | No                              | Yes                                            |
| <i>ALDH1A2</i>      | 603687  | -                                                                                         | Tetralogy of Fallot                                 | No                              | Yes                                            |
| <i>HAND1</i>        | 602406  | -                                                                                         | Atrial Septal Defect, Hypoplastic Left Heart        | No                              | Yes                                            |
| <i>SMAD6</i>        | 602931  | -                                                                                         | Aortic Valve Disease                                | No                              | Yes                                            |

Abbreviations: AVSD, atrioventricular septal defect; CHD, congenital heart disease.



## NGS in families with fetal non-syndromic AVSDs

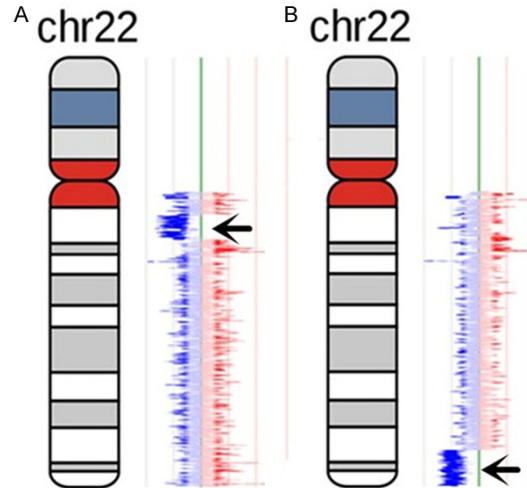

**Supplementary Figure 1.** Two CNVs larger than 1 Mb were detected by low-pass WGS. They were heterozygous deletions at chromosome 22q11.21 (A) and chromosome 22q13.31q13.33 (B), the length of them were 2.78 Mb and 4.29 Mb, respectively.

**Supplementary Table 3.** Primers Design for AVSD-associated genes contained in CNVs

| Gene           | Forward Primer         | Reverse Primer         | Product Length |
|----------------|------------------------|------------------------|----------------|
| <i>NOTCH2</i>  | AGGCACCTGTATTGACCTTG   | TCCAATCCTATCCATGCACTG  | 142 Bp         |
| <i>COL11A1</i> | CAGGTGGAACCTTCCAGAA    | GCAGTTTTCCAGTGTGGTC    | 169 Bp         |
| <i>NIPBL</i>   | GCTGGCACCTGAACTAAGTAC  | GTAAAGGAGATGGAAGAGGCAG | 150 Bp         |
| <i>EHMT1</i>   | GCCAGTAAAGATCCAGAGAAG  | GTAGCACTGGTTCTGAGGTAG  | 150 Bp         |
| <i>NR2F2</i>   | TCAAAGTGGGCATGAGACG    | CGCAACAGCAGGGAAATATATC | 142 Bp         |
| <i>COL6A1</i>  | CGAATGCGAGATTTGGACATC  | ACGAAGTCCTTGGCAATCTC   | 138 Bp         |
| <i>COL6A2</i>  | CAGCCCTCAAGTTGCCTAC    | TCACTCTCGTGCTTCTCGTG   | 196 Bp         |
| <i>SMC1A</i>   | GGTAGAGGATGAGGTGTTGAAG | ACTGAATGCCAAGCGAG      | 149 Bp         |

**Supplementary Table 4.** CNVs containing the AVSD-associated genes in DECIPHER

| Candidate gene | Patients, CNVs and phenotypes                                                                                                                                                                                                                                                                                                                                                                    |
|----------------|--------------------------------------------------------------------------------------------------------------------------------------------------------------------------------------------------------------------------------------------------------------------------------------------------------------------------------------------------------------------------------------------------|
| <i>NOTCH2</i>  | Patient 250,335 with 14.55 Mb deletion at 1p12p21.1 has ASD, VSD<br>Patient 317,280 with 4.20 Mb deletion at 1p12p13.2 has VSD                                                                                                                                                                                                                                                                   |
| <i>COL11A1</i> | None                                                                                                                                                                                                                                                                                                                                                                                             |
| <i>NIPBL</i>   | Patient 4,651 with 177.78 Kb deletion at 5p13.2 with VSD<br>Patient 285,915 with 22.17 Mb duplication at 5p13.2q11.2 has ASD<br>Patient 341,218 with 422.15 Kb duplication at 5p13.2 has ASD<br>Patient 350,097 with a heterozygous and definitely pathogenic frameshift variant (Val2227PhefsTer25) has complete AVSD (SNV)                                                                     |
| <i>EHMT1</i>   | Patient 771 with 3.03 Mb deletion at 9q34.3 has VSD<br>Patient 1,003 with 2.22 Mb deletion at 9q34.3 has ASD, VSD<br>Patient 250,053 with 192.76 Kb deletion at 9q34.3 has ASD<br>Patient 251,553 with 561.12 Kb deletion at 9q34.3 has ASD<br>Patient 269,405 with 293.64 Kb deletion at 9q34.3 has ASD<br>Patient 285,975 with 589.35 Kb definitely pathogenic deletion at 9q34.3 has ASD, VSD |
| <i>NR2F2</i>   | Patient 2,219 with 8.54 Mb duplication at 15q26.1q26.3 has AVSD<br>Patient 251,099 with 6.60 Mb deletion at 15q26.2q26.3 has VSD<br>Patient 256,144 with 10.65 Mb duplication at 15q26.1q26.3 has ASD                                                                                                                                                                                            |

## NGS in families with fetal non-syndromic AVSDs

|               |                                                                                           |
|---------------|-------------------------------------------------------------------------------------------|
|               | Patient 259,934 with 7.10 Mb deletion at 15q26.2q26.3 has VSD                             |
|               | Patient 277,356 with 3.56 Mb deletion at 15q26.2q26.3 has VSD                             |
|               | Patient 286,739 with 3.71 Mb likely pathogenic deletion at 15q26.2q26.3 has VSD           |
|               | Patient 259,383 with a likely pathogenic SNV has complete AVSD                            |
| <i>COL6A1</i> | None                                                                                      |
| <i>COL6A2</i> | None                                                                                      |
| <i>TBX1</i>   | Patient 256,300 with 2.40 Mb deletion at 22q11.21 has AVSD                                |
|               | Patient 286,085 with 2.49 Mb definitely pathogenic deletion at 22q11.1q11.21 has ASD, VSD |
|               | Patient 300,420 with 2.42 Mb definitely pathogenic duplication at 22q11.21 has ASD, VSD   |
| <i>SHANK3</i> | Patient 253,900 with 86.55 Kb duplication at 22q13.33 has AVSD                            |
|               | Patient 353,765 with 55.33 Kb duplication at 22q13.33 has VSD                             |
| <i>SMC1A</i>  | Patient 256,035 with 1.32 Mb duplication at Xp11.22 has VSD                               |

Abbreviations: CNV, copy number variation; AVSD, atrioventricular septal defect; ASD, atrial septal defect; VSD, ventricular septal defect; SNV, single nucleotide variants.

**Supplementary Table 5. Primers Design for Sanger sequencing**

| Gene           | Position    | Nucleotide changes | Forward Primer          | Reverse Primer            | Product Length |
|----------------|-------------|--------------------|-------------------------|---------------------------|----------------|
| <i>COL11A1</i> | 1:103496805 | 652-5->TT          | TTTCTGAGCCAGAAGATAACA   | CAAAAAGTGCCTGCGATGT       | 427 Bp         |
|                | 1:103412451 | 3266C>T            | ACATGCCAGACACATATGCAG   | TGGATTCAACTGTTTCTCTTTGG   | 388 Bp         |
| <i>COL6A2</i>  | 21:47532276 | 499G>A             | ATCCACGTGTACTTCGTGCTG   | TCACCATGACCTTGATGATGC     | 586 Bp         |
|                | 21:47532456 | 679G>A             | CTGGCCAACATGACGGAG      | GGTAAAGTGAGGCCCGGAG       | 384 Bp         |
|                | 21:47552204 | 2798G>A            | ACGACGACCCTCTCAACG      | AGGAGCTGGAGAGGTGCAG       | 588 Bp         |
| <i>C5ORF42</i> | 5:37170162  | 6443A>G            | CACCCGGCTGACTTTTGTAT    | CTGTGCATTTAGGGGAAAGC      | 355 Bp         |
|                | 5:37125396  | 8746G>A            | TGCCAAATTACAAATGTATCCAA | AGGTAACAAATTGGAGTGAGTTGAC | 434 Bp         |
|                | 5:37243184  | 608A>G             | AAGGCAGGAGGACTGCTTG     | CTGCCTCTGGCTCAGAAAAA      | 504 Bp         |
| <i>GLI3</i>    | 7:42188023  | 169G>A             | ATAAAGCGCGCACACACAC     | GCTCTCAAAGTTGCTGTGAATG    | 481 Bp         |
|                | 7:42188028  | 164G>A             | ATAAAGCGCGCACACACAC     | GCTCTCAAAGTTGCTGTGAATG    | 481 Bp         |
| <i>LRP2</i>    | 2:170038738 | 9937G>A            | TTACATGAACAGCCTTCTCGG   | TAGCTTGGGTAGGAAACTGGG     | 315 Bp         |
|                | 2:170038761 | 9914G>A            | TTACATGAACAGCCTTCTCGG   | TAGCTTGGGTAGGAAACTGGG     | 315 Bp         |
| <i>GATA6</i>   | 18:19751148 | 43G>C              | CTTGTTAACCCGTCGATCTCC   | TCAGTGAACAGCAGCAAGTCC     | 439 Bp         |
|                | 18:19751656 | 551G>A             | CTGCTGTTCACTGACCTCGAC   | GTATGGAGGGCTGTCGGC        | 369 Bp         |
| <i>HSPG2</i>   | 1:22161303  | 10589G>A           | TGTCCCAAGTGAACAGAAAAGG  | TTGGGCAGTCTATGGCCTC       | 454 Bp         |
|                | 1:22206994  | 2057T>C            | GACAAGCCAGAATAGCCAATG   | TAGGGCTGGGAGCAAAGG        | 408 Bp         |
|                | 1:22217079  | 353C>T             | TCAAGTACTCCGACTCCAGCTG  | TATTTCCGAGCCCTGGTGA       | 226 Bp         |
